# Supplementary material for: Variation in Pheidole nodus (Hymenoptera: Formicidae) functional morphology across urban parks
Source: PeerJ. 2023 Jul 18;11:e15679. doi: 10.7717/peerj.15679 (PMC10361077; doi:10.7717/peerj.15679)
Supplement: Data S1 — The raw data shows the functional morphology of all ant individuals which were collected from urban parks. These ants were used for statistical analysis to compare populations among parks. [file peerj-11-15679-s004.xlsx]

## Sheet: Nanchong
group	site	HW (mm)	ML (mm)	EW (mm)	SL (mm)	WL (mm)	HLG (mm)
1	BT	0.70772	0.19779	0.1344	1.0205	1.03735	2.13864
1	BT	0.75871	0.19574	0.14263	1.01108	1.10584	1.87723
1	BT	0.72377	0.15739	0.13265	0.98516	1.03853	2.05767
1	BT	0.67284	0.17188	0.12311	0.95801	0.94861	2.03616
1	BT	0.72671	0.18034	0.16741	0.93765	1.06169	2.24239
1	BT	0.75783	0.18785	0.13556	0.96228	1.08794	1.89733
1	BT	0.72246	0.16909	0.14188	0.92714	1.0486	1.91632
1	BT	0.7388	0.24448	0.13319	0.99017	1.01131	2.0866
1	BT	0.71547	0.19227	0.14086	0.98716	1.00417	2.17343
1	BT	0.73595	0.19052	0.14531	1.13718	1.06527	2.13234
1	BT	0.67869	0.09892	0.12807	0.92236	1.00254	1.98343
1	BT	0.76547	0.26525	0.13534	1.06161	1.11079	2.21348
1	BT	0.58369	0.27849	0.12578	0.86702	0.99995	2.04398
1	BT	0.71113	0.2411	0.11493	1.01658	1.09648	2.1157
1	BT	0.7568	0.1628	0.13138	0.8242	1.10049	2.24004
1	BT	0.75756	0.24457	0.13842	1.0179	1.10571	2.13429
1	BT	0.72952	0.17671	0.13008	0.91676	0.98597	1.73376
1	BT	0.771	0.20374	0.1363	0.81635	1.07784	2.20631
1	BT	0.77303	0.17899	0.13934	0.98576	1.12135	2.2334
2	CS	0.7057	0.18376	0.11965	0.95755	1.00406	1.96707
2	CS	0.71848	0.20201	0.1191	0.82253	0.97184	2.04608
2	CS	0.64757	0.19965	0.122	0.92275	0.93567	1.85323
2	CS	0.67846	0.16499	0.12058	0.87054	0.95946	2.00183
2	CS	0.63779	0.16698	0.11993	0.89457	0.93906	1.6615
2	CS	0.70003	0.2088	0.12151	0.9533	1.02436	1.69009
2	CS	0.66986	0.22636	0.12473	0.92033	0.93986	1.89835
2	CS	0.69144	0.23324	0.1244	0.76892	0.97676	1.88439
2	CS	0.7086	0.17959	0.13299	1.01021	1.00106	1.7699
2	CS	0.73135	0.15561	0.1192	0.89963	1.02329	2.06714
2	CS	0.69556	0.09767	0.12751	0.96744	1.00961	2.05576
2	CS	0.69307	0.19799	0.12735	0.95473	0.9888	1.89971
2	CS	0.67187	0.226	0.12851	0.9439	0.96635	1.93152
2	CS	0.70931	0.17429	0.11836	0.94568	0.99614	1.72954
2	CS	0.69578	0.24445	0.12698	0.87684	1.02101	2.11049
3	HH	0.6993	0.15337	0.1236	0.94331	0.9661	1.8072
3	HH	0.75756	0.21448	0.13121	0.95487	1.07987	2.04348
3	HH	0.79522	0.2642	0.14662	0.9033	1.10763	1.87325
3	HH	0.72465	0.19431	0.13687	0.981	0.9196	1.73629
3	HH	0.6993	0.25111	0.13681	0.90281	1.06664	2.05204
3	HH	0.75721	0.28966	0.13386	0.97588	1.08752	2.0319
3	HH	0.68731	0.16019	0.12504	0.91453	0.96549	1.7662
3	HH	0.75566	0.15276	0.11112	0.98545	1.08456	2.05644
3	HH	0.70615	0.25688	0.13519	0.90116	1.01861	2.02575
3	HH	0.68345	0.1202	0.12297	0.94474	0.99004	1.94559
3	HH	0.67771	0.17852	0.13588	0.88007	1.0243	1.98236
3	HH	0.70116	0.23132	0.13245	0.97145	1.04058	1.82545
3	HH	0.71404	0.14957	0.12231	0.9271	1.03359	1.76573
3	HH	0.75961	0.24216	0.13634	0.9078	1.1013	1.81634
3	HH	0.76232	0.22453	0.14289	0.887	1.08161	1.80011
4	NH	0.68981	0.21832	0.11718	0.90317	0.91035	1.9741
4	NH	0.54728	0.18256	0.09353	0.78447	0.81506	1.52743
4	NH	0.66498	0.11987	0.11473	0.98417	1.0165	2.10539
4	NH	0.6931	0.20699	0.12919	0.82952	1.06379	1.84718
4	NH	0.57067	0.08849	0.10667	0.74034	0.84252	1.70435
4	NH	0.70465	0.19577	0.13435	0.93711	0.99805	2.06893
4	NH	0.70437	0.22893	0.11999	0.95577	0.97447	1.77679
4	NH	0.54909	0.15992	0.0986	0.7649	0.79509	1.51875
4	NH	0.72724	0.20468	0.15463	0.97554	1.0747	2.13872
4	NH	0.72698	0.24711	0.13285	1.06636	0.98054	1.72791
4	NH	0.67437	0.16305	0.13426	0.93934	0.94846	1.56081
4	NH	0.7134	0.1911	0.12704	0.90046	1.00537	1.78032
4	NH	0.72271	0.14671	0.13689	0.98602	0.99352	2.04576
4	NH	0.67906	0.24846	0.12678	0.81969	0.96053	1.943
4	NH	0.7316	0.22855	0.11351	0.9781	1.02009	2.04029
4	NH	0.69611	0.25668	0.12329	0.88117	0.9443	1.84213
4	NH	0.70326	0.13957	0.11289	0.93238	0.93096	1.77706
4	NH	0.60595	0.15144	0.10821	0.71828	0.92524	1.80472
5	QX	0.76236	0.22304	0.13789	0.98614	1.07534	2.14741
5	QX	0.74013	0.22248	0.12079	0.99723	1.07448	1.98311
5	QX	0.73991	0.14469	0.138	0.9694	1.08499	1.99841
5	QX	0.77324	0.18375	0.10502	0.9657	1.06077	2.05948
5	QX	0.75108	0.13578	0.13078	0.98338	1.11521	2.05576
5	QX	0.70562	0.1645	0.11453	0.98765	1.01665	2.0585
5	QX	0.77707	0.14384	0.138	0.99634	1.0815	2.04956
5	QX	0.79734	0.24628	0.12907	1.01628	1.09563	2.03453
5	QX	0.73764	0.20525	0.1436	1.03123	1.03461	2.00237
5	QX	0.63875	0.17126	0.14221	0.86492	0.91236	1.65767
5	QX	0.73864	0.1455	0.11135	0.87432	1.1044	1.90182
5	QX	0.74132	0.14637	0.14604	1.03141	1.09111	1.91657
5	QX	0.74614	0.22095	0.13287	1.00218	1.08273	2.02763
5	QX	0.71765	0.22851	0.14993	1.01766	1.09282	2.2729
5	QX	0.85632	0.24811	0.12594	1.03613	1.15801	2.34401
5	QX	0.62336	0.11005	0.12726	0.87139	0.95632	1.77274
5	QX	0.70898	0.12377	0.13938	0.93117	1.0107	2.02715
5	QX	0.73757	0.2279	0.12974	0.99961	1.06061	2.11289
5	QX	0.73926	0.14355	0.12834	0.99806	1.03583	2.05319
5	QX	0.70938	0.17617	0.12241	1.03061	1.00447	2.04691
5	QX	0.72993	0.19997	0.10446	1.02117	1.02438	2.07113
5	QX	0.75226	0.12476	0.12047	0.98151	1.09044	2.10084
5	QX	0.71119	0.21207	0.13244	0.9916	1.0324	2.0539
5	QX	0.69881	0.17114	0.12456	0.97455	1.0376	2.00795
5	QX	0.69959	0.18959	0.10943	0.94959	0.9642	1.93173
5	QX	0.71323	0.12405	0.13643	0.98281	1.04659	2.09325
5	QX	0.77378	0.23238	0.15239	1.01447	1.12108	2.18901
5	QX	0.75656	0.19627	0.14113	1.00669	1.06048	2.07977
5	QX	0.77264	0.21868	0.11543	1.00353	1.09608	2.17535
5	QX	0.74728	0.18163	0.13574	0.98129	1.04246	1.97988
5	QX	0.7482	0.18789	0.1381	0.94562	1.06224	2.10518
5	QX	0.65479	0.18591	0.12334	0.91546	0.96107	1.8679
5	QX	0.67739	0.2456	0.13307	0.93573	0.99595	1.89585
5	QX	0.66645	0.23251	0.13574	1.00344	0.98128	1.88839
5	QX	0.75739	0.17055	0.12141	1.14484	1.08933	2.21999
5	QX	0.74454	0.19059	0.13195	0.95122	1.01822	2.1159
5	QX	0.6869	0.2766	0.11624	0.98995	1.01722	2.10903
5	QX	0.71267	0.2641	0.12961	0.99594	1.05852	2.18972
6	ST	0.72832	0.20416	0.12202	1.0293	1.06407	2.01733
6	ST	0.64327	0.15148	0.1184	0.86972	0.95854	1.59684
6	ST	0.69748	0.22297	0.1357	0.91861	0.9955	2.03763
6	ST	0.71694	0.17299	0.1322	0.72743	0.984	1.74639
6	ST	0.71455	0.16371	0.1197	0.9416	1.00929	1.72573
6	ST	0.6939	0.21093	0.11522	0.89303	0.98768	1.92525
6	ST	0.70626	0.23048	0.13896	0.96525	0.99758	1.9799
6	ST	0.6842	0.15042	0.12187	0.94125	0.98269	2.0514
6	ST	0.68177	0.25644	0.12645	0.95913	1.05842	2.07383
6	ST	0.64624	0.21258	0.11743	0.97634	1.00898	1.91734
6	ST	0.69501	0.24702	0.12571	0.98326	0.99162	2.11555
6	ST	0.6528	0.15277	0.12972	0.84746	1.00765	1.99729
6	ST	0.71395	0.16869	0.13081	0.98234	0.94305	1.97346
6	ST	0.68215	0.22829	0.136	0.90112	1.00074	2.07729
6	ST	0.69255	0.22568	0.12378	0.77539	1.02159	1.8027
7	XS	0.73786	0.23637	0.12855	0.96795	1.03072	2.08052
7	XS	0.74456	0.16644	0.14699	1.04232	1.11207	2.11986
7	XS	0.76862	0.23712	0.10783	0.91615	1.11784	2.04266
7	XS	0.76525	0.17044	0.14544	0.96987	1.0889	2.13132
7	XS	0.73016	0.2582	0.14119	0.94513	1.0857	2.0094
7	XS	0.72629	0.15422	0.14323	0.88829	1.02859	2.13356
7	XS	0.74885	0.27796	0.13626	1.03442	1.04117	2.10575
7	XS	0.72717	0.15102	0.13895	0.96919	0.99246	2.08873
7	XS	0.69089	0.25614	0.1258	0.99695	0.93579	2.03128
7	XS	0.66185	0.21399	0.13011	0.95667	0.97868	1.92286
7	XS	0.68793	0.23855	0.12435	0.9982	1.00361	1.8802
7	XS	0.71033	0.20426	0.12917	0.94381	1.00677	1.97428
7	XS	0.69702	0.21065	0.14654	0.94555	0.98751	2.13216
7	XS	0.7626	0.24951	0.12659	0.99692	1.08113	2.03354
7	XS	0.7585	0.15547	0.15086	1.01319	1.02034	2.17332
7	XS	0.69496	0.10442	0.12179	0.97304	0.99386	1.98339
7	XS	0.71899	0.19265	0.13443	0.86867	0.97689	1.89814
7	XS	0.68374	0.16503	0.12214	0.94059	0.95992	1.98752
7	XS	0.71604	0.19753	0.13056	0.93454	0.93245	2.0645
7	XS	0.71187	0.21665	0.13821	0.85014	1.02464	2.05146
7	XS	0.67755	0.15154	0.12893	0.92749	0.96879	1.91298
7	XS	0.66306	0.1865	0.12708	0.85635	0.99196	1.90282
7	XS	0.68703	0.21854	0.13686	0.98736	0.98498	1.91784
7	XS	0.69046	0.24143	0.1356	0.95873	0.99681	1.96516
7	XS	0.67137	0.2335	0.11138	0.99787	1.01012	1.99819
7	XS	0.66784	0.2511	0.11976	0.96837	0.99853	1.91674
7	XS	0.70598	0.22285	0.13915	1.0062	1.02613	2.02293
7	XS	0.70139	0.16046	0.11752	0.87486	1.0099	1.92264
7	XS	0.62949	0.14	0.10571	0.84078	0.96318	1.73154
7	XS	0.68561	0.2334	0.11439	0.96046	0.99956	1.96803
7	XS	0.74264	0.19579	0.14399	0.90416	0.90758	2.20381
7	XS	0.67024	0.21898	0.11947	0.93062	0.94664	2.0454
7	XS	0.68009	0.24897	0.15377	0.85576	0.96221	1.78283
7	XS	0.69742	0.19983	0.11107	0.73469	0.99665	1.93263
7	XS	0.66576	0.21225	0.11632	0.86755	0.97246	1.84263
7	XS	0.7056	0.23511	0.12745	0.89136	1.00129	2.02101
7	XS	0.74312	0.25043	0.13168	0.79531	1.07176	2.07803
7	XS	0.73876	0.22942	0.13814	0.90476	1.05642	2.12445
7	XS	0.70435	0.26694	0.13351	1.12367	1.11316	2.10178
7	XS	0.56133	0.30948	0.14474	0.9684	0.98463	2.02087
7	XS	0.72352	0.15167	0.12547	0.99348	1.02567	2.00262
7	XS	0.70593	0.35653	0.12992	0.9139	1.03421	2.1084
7	XS	0.68701	0.24446	0.12835	0.92132	1.0074	2.00644
