# Supplementary material for: Variation inPheidole nodus(Hymenoptera: Formicidae) functional morphology across urban parks
Source: PeerJ journal article supplement (doi:10.7717/peerj.15679), 2023-07-18

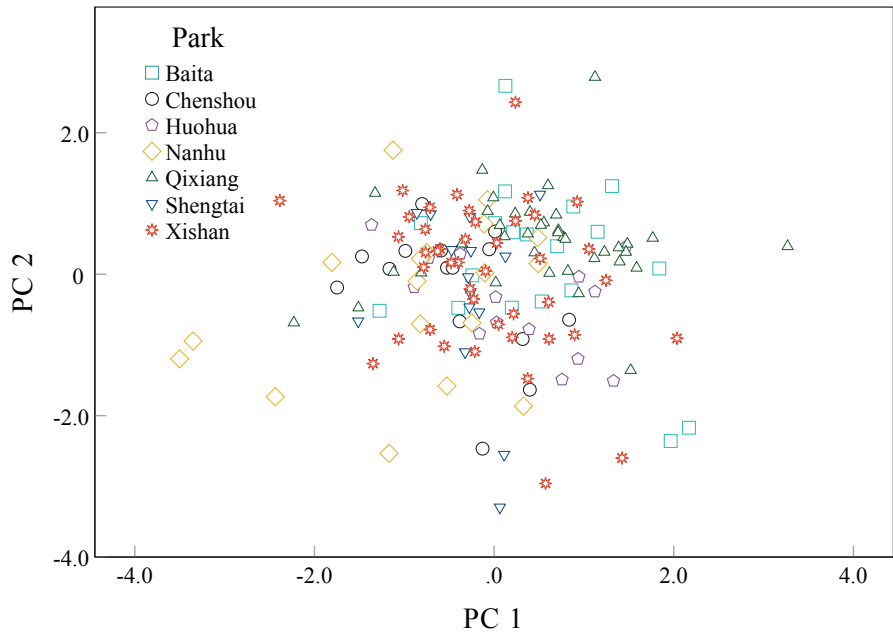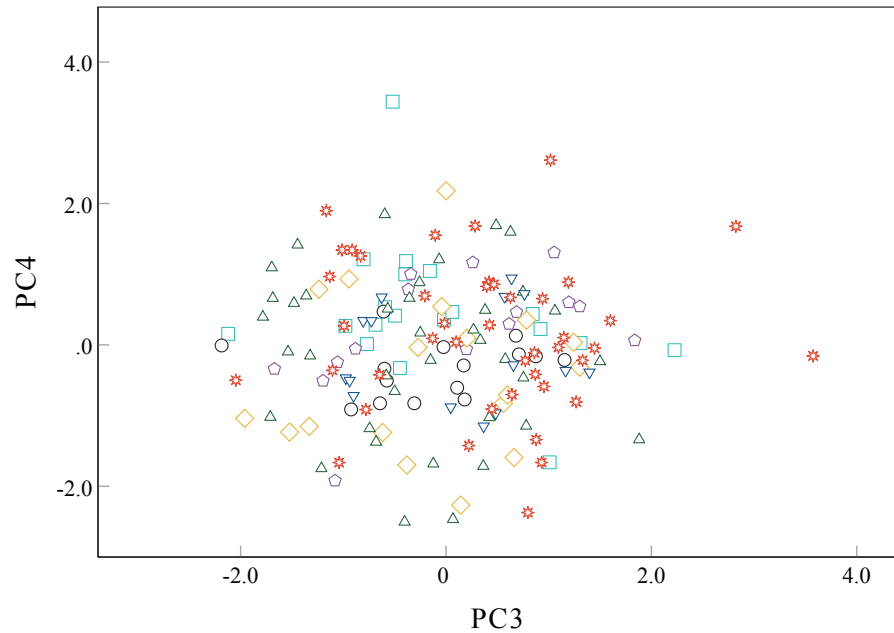

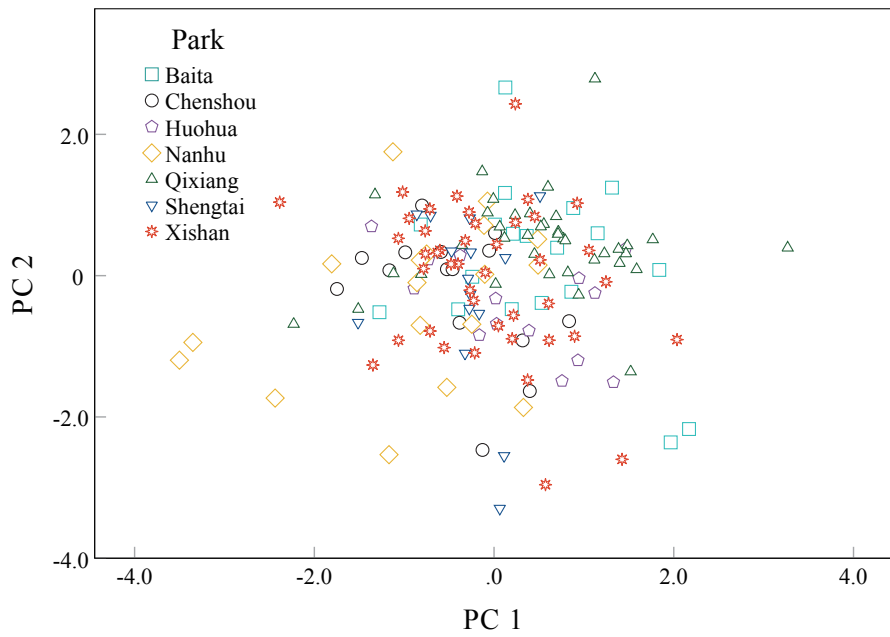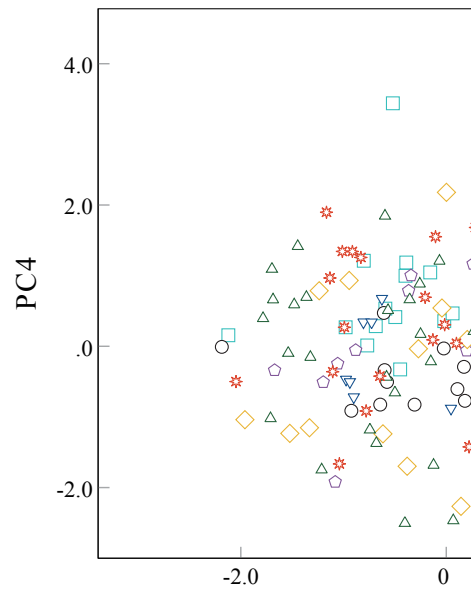

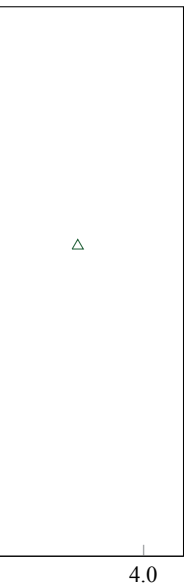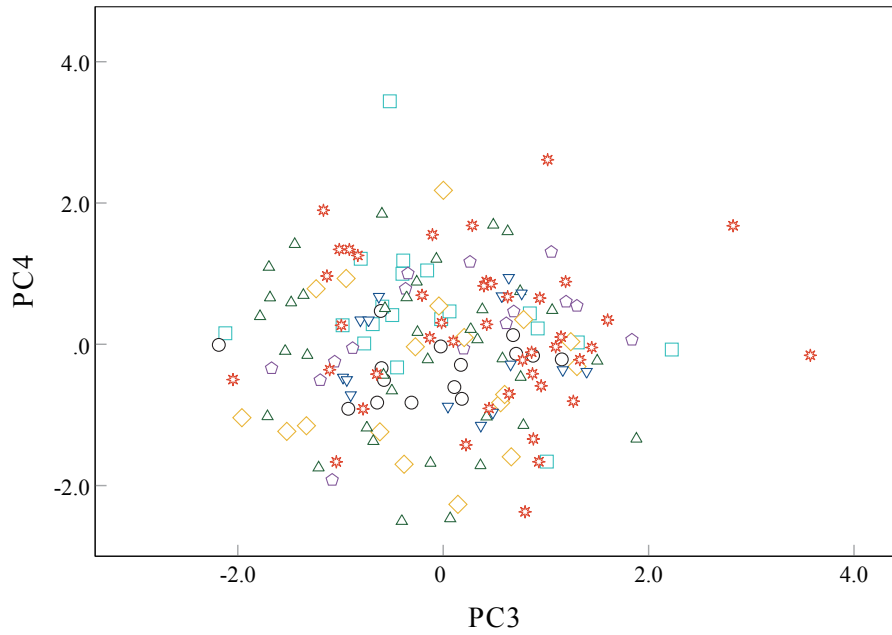

Supplement: Figure_S2.pdf [file Figure_S2.pdf]
