# Supplementary material for: Variation inPheidole nodus(Hymenoptera: Formicidae) functional morphology across urban parks
Source: PeerJ journal article supplement (doi:10.7717/peerj.15679), 2023-07-18

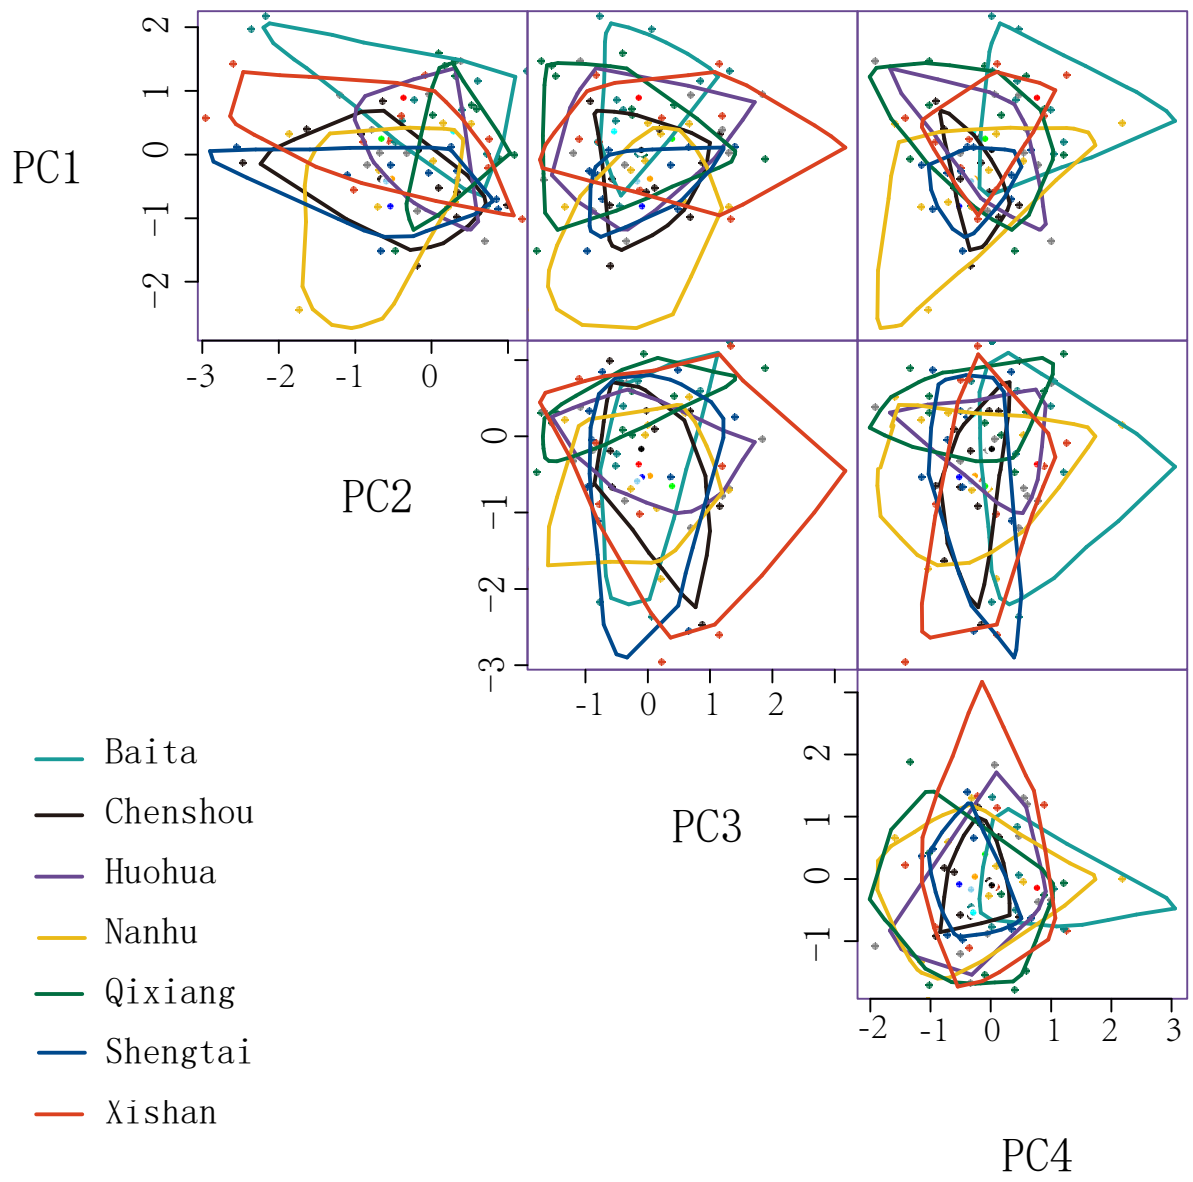

Supplement: Figure_S3.pdf [file Figure_S3.pdf]
